# Supplementary material
Source: publisher site journal article supplement (https://www.dovepress.com/article/261124)
Supplement: Supplementary file 1 [file get_supplementary_file.php]

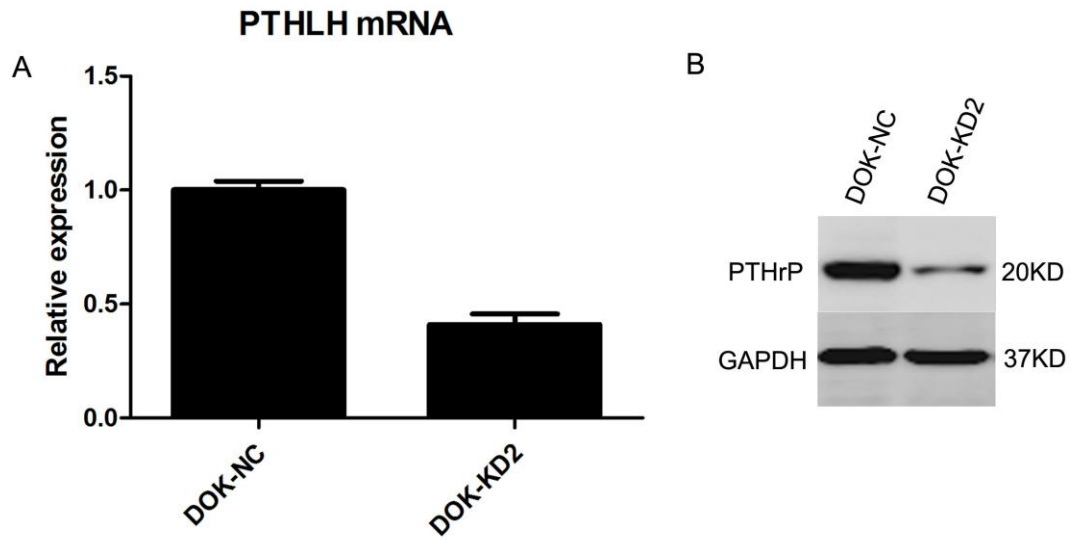

Supplementary Figure S1 legend: *PTH LH* and PTHrP expression were analyzed in DOK cell after seven days which transfected with lentivirus-mediated *PTH LH*-targeted shRNA; **A**: the expression of *PTH LH* mRNA was analyzed in the transfected cells; **C**: the expression of PTHrP was analyzed in the transfected cells.
